# Supplementary material for: Medullary tachykinin precursor 1 neurons promote rhythmic breathing
Source: eLife. 2023 Jul 17;12:e85575. doi: 10.7554/eLife.85575 (PMC10400077; doi:10.7554/eLife.85575)
Supplement: Figure 1—figure supplement 1—source data 1. [file elife-85575-fig1-figsupp1-data1.xlsx]

## Sheet: Supp Figure 3a
	Respiratory rate (breaths/min)
	Tac1-ChETA-2 weeks
	Baseline				Stimulation
Animals →	A1	A2	A3	A4	A1	A2	A3	A4
Laser frequency (Hz)
5	22.2437	29.441	26.3137	27.1144	22.26	25.25	25.69	26.96
10	25.2828	29.2756	25.459	26.5017	24.07	26.55	26.01	25.12
20	26.2572	26.73	24.8617	29.4338	25.01	24.98	24.9	27.04
30	26.2842	23.1837	22.8754	30.1909	26.15	21.63	21.84	28.3
40	26.8312	22.818	21.0832	29.5799	26.85	23.61	23.43	27.53

## Sheet: Supp Figure 3b
	Respiratory rate (breaths/min)
	Tac1-ChETA-4 weeks
	Baseline															Stimulation
Animals →	A1	A2	A3	A4	A5	A6	A7	A8	A9	A10	A11	A12	A13	A14	A15	A1	A2	A3	A4	A5	A6	A7	A8	A9	A10	A11	A12	A13	A14	A15
Laser frequency (Hz)
5						31.5434	12.2109	16.4826	33.1041	22.6911	14.6556	7.62034	37.3286	20.5003	41.5007						31.05	12.73	17.75	31.14	22.56	16.25	7.75	39.55	20.07	45.73
10						30.2083	10.3469	13.5911	31.2839	22.4302	11.6575	7.95678	35.6033	18.3444	38.1455						32.11	14.33	14.62	31.42	23.23	12.76	7.4	36.99	18.06	47.88
20	30.234	9.55526	11.3501	18.6129	21.8498	31.2321	14.5905	12.9451			9.77215	11.2798	28.9185	16.188	28.7955	39.73	16.66	17.87	23.13	24.26	33.69	18.97	20.66			15.01	13.08	30.2	21.2	45.46
30	29.3318	11.6639	13.1772	12.986	29.6376	29.7414	15.7336	17.5563			9.50155	8.58071	20.2434	16.1268	27.6	43.16	21.58	23.8	23.13	31.55	32.84	21.94	24.49			14.18	15.89	25.27	21.85	42.69
40	33.1139	11.8999	11.7936	9.91487	25.0342	30.727	13.9797	17.4664			10.4731	12.1776	14.7387	16.0173	27.2485	56.31	19.47	22.62	22.94	25.55	31.4	21.77	23.68			13.75	16.14	22.8	23.45	48.46
