# Supplementary material for: Medullary tachykinin precursor 1 neurons promote rhythmic breathing
Source: eLife. 2023 Jul 17;12:e85575. doi: 10.7554/eLife.85575 (PMC10400077; doi:10.7554/eLife.85575)
Supplement: Figure 1—source data 1. [file elife-85575-fig1-data1.xlsx]

## Sheet: Figure 1c
	Respiratory rate (% from baseline)
	Control					Tac1-ChETA-2 weeks				Tac1-ChETA-4 weeks
Animals →	A1	A2	A3	A4	A5	B1	B2	B3	B4	C1	C2	C3	C4	C5	C6	C7	C8	C9	C10	C11	C12	C13	C14	C15	C16
Laser frequency (Hz)
5		98.6189	98.9578	103.842	100.101	100.11	85.7984	97.641	99.4407						98.444	104.321	107.739	94.0818	99.4641	103.952
10		100.497	96.395	101.072	99.8872	95.2332	90.7238	102.187	94.8179						106.297	138.531	107.614	100.447	103.606	104.728
20	94.2	100.163	90.6608	99.819	99.5629	95.26	93.48	100.19	91.88	131.421	173.996	157.473	124.281	111.049	107.8	130	159.6				153.631	115.975	104.458	130.997	157.898
30	96.4	102.828	99.4337	103.354	99.7645	99.52	93.31	95.5	93.8	147.17	185.078	180.705	178.15	106.461	110.4	139.5	139.4				149.271	185.217	124.87	135.509	154.705
40	91.2	98.062	106.083	98.379	101.119	100.07	96.53	111.1	93.09	170.056	163.678	191.845	231.428	102.096	102.221	155.7	135.6				131.313	132.617	154.711	146.457	177.853

## Sheet: Figure 1d
	Diaphragm amplitude (% from baseline)
	Control					Tac1-ChETA-2 weeks				Tac1-ChETA-4 weeks
Animals →	A1	A2	A3	A4	A5	B1	B2	B3	B4	C1	C2	C3	C4	C5	C6	C7	C8	C9	C10	C11	C12	C13	C14
Laser frequency (Hz)
5		98.9408	97.1414	98.9146	99.58	92.9263	90.3092	95.2187	99.2202					97.5963	100.674	98.6594	96.7874	100.98
10		99.3745	100.049	100.727	99.4791	97.1681	101.275	97.1643	99.2874					83.7172	96.9798	94.7399	106.039	83.6678
20	104.3	99.45	99.8431	97.16	98.599	103.92	85.39	99.41	117.45	103.963	92.556	91.604	94.735	88.401	102				96.8801	95.8643	93.1372	79.7476	109.219
30	107.4	108.976	94.3554	89.085	99.4311	107.04	78.46	101.28	106.12	99.353	75.934	86.147	83.233	106.974	97.4				97.3762	99.0258	94.2884	93.8675	116.557
40	96.4	100.912	107.329	99.659	98.2371	111.24	89.46	92.37	115.23	101.563	91.828	94.68	77.135	103.105	100.2				96.9118	98.7166	76.3038	85.3093	117.814

## Sheet: Figure 1e
	Inspiratory time (% from baseline)
	Control				Tac1-ChETA-4 weeks
Animals →	A1	A2	A3	A4	B1	B2	B3	B4	B5	B6	B7	B8	B9	B10
Laser frequency (Hz)
20	97.73	92.4	75.35	93.86	91.65	84.2	106.18	99.26	101.97	104.5	115.95	103.74	96.15	88.96
30	104.8	89.47	106.7	84.2	143.67	101.08	97.87	91.6	110.22	91.92	98.96	89.71	93.75	92.76
40	85.43	123.85	84.41	108.7	100.8	127.36	90.06	89.86	98.35	110	113.63	102.38	109.2	105.97

## Sheet: Figure 1f
	Expiratory time (% from baseline)
	Control				Tac1-ChETA-4 weeks
Animals →	A1	A2	A3	A4	B1	B2	B3	B4	B5	B6	B7	B8	B9	B10
Laser frequency (Hz)
20	100.18	115.37	88.2	105.13	69.49	50.74	58.94	78.33	104.61	91.335	121.06	94.49	93.6	116.59
30	96.92	109.4	98.2	102.7	56.73	56.86	38.05	60.71	113.69	103	101.33	94.6	70.93	79.53
40	97.7	94.17	87.89	88.83	65.04	41.18	49.7	46.45	106.85	77.33	95.12	100.41	60.62	76.15

## Sheet: Figure 1g
Respiratory rate (% from baseline)
Tac1-ChETA-4 weeks
Laser power (1 mW)	Laser power (3 mW)	Laser power (5 mW)	Laser power (10 mW)
97.3	112.4	125.242	147.17
114.193	104.54	125.862	185.078
95.7	95.67	164.169	180.705
108.14	96.196	122.347	178.15
136.598	133.274	105.033	106.641
99.2077	123.659	110.243	110.446
66.1742	165.658	126.483	139.465
		177.105	139.43
		160.04	149.271
		136.896	135.509
		156.984	154.705
			185.217
			124.87
