# Supplementary material for: Medullary tachykinin precursor 1 neurons promote rhythmic breathing
Source: eLife. 2023 Jul 17;12:e85575. doi: 10.7554/eLife.85575 (PMC10400077; doi:10.7554/eLife.85575)
Supplement: Figure 2—source data 1. [file elife-85575-fig2-data1.xlsx]

## Sheet: Figure 2b
TAC1-ChETA-4 weeks 30Hz
Stimulation phase (% of baseline)	Period (% of baseline)
65.9898	70.0508
97.4874	112.563
20	24.7619
26.3158	36.8421
52.6316	57.8947
61.9883	66.2768
69.3046	74.3405
37.6694	51.4905
69.0423	73.2739
42.7273	47.2727
77.0588	80
21.5352	33.2623
45.0304	50.9128
54.1176	104.314
50	62.1429
22	146.667
45	95.5
72.2222	91.1111
12.8	76.8
13.0435	121.739
85.6604	93.2075
58.8933	113.043
57.1429	68.7075
72.5632	81.5884
75.9494	89.8734
92.9782	97.3366
68.1499	72.8337
78.4753	81.3901
52.809	66.2921
80.7018	87.7193
43.1394	45.3348
29.0647	49.7842
48.913	59.7826
83.9181	88.3041
5.65217	96.9565
86.2944	93.9086

## Sheet: Figure 2d
Period (% of baseline)
TAC1-ChETA-4 weeks 30Hz
Inspiration	Early expiration (IE)	Late expiration (LE)
146.667	47.2727	70.0508
121.739	120.091	112.563
82.7143	104.314	66.2768
96.9565	95.5	73.2739
121.364	66.2921	91.1111
129.707	94.7917	93.2075
133.333	45.3348	113.043
	49.7842	68.7075
	59.7826	81.5884
	56.9948	97.3366
	57.2816	72.8337
	33.2623	81.3901
	62.1429	87.7193
	72.2222	88.3041
	24.7619	93.9086
	36.8421	113.571
	57.8947	76.3265
		79.148
		80
		62.3688
		89.8734
		92.5532
		81.3636
