# Supplementary material for: Medullary tachykinin precursor 1 neurons promote rhythmic breathing
Source: eLife. 2023 Jul 17;12:e85575. doi: 10.7554/eLife.85575 (PMC10400077; doi:10.7554/eLife.85575)
Supplement: Figure 3—source data 1. [file elife-85575-fig3-data1.xlsx]

## Sheet: Figure 3e, f
Region of the preBotzinger complex (PreBotC)
					% of DAPI cells			% co-expressing cells
Animal 1	DAPI (# cells)	Vglut2 (# cells)	Tac1 (# cells)	Vglut2+Tac1 (# cells)	Vglut2	Tac1	Vglut2+Tac1	Vglut2+Tac1 / Tac1	Vglut2+Tac1 / Vglut2
S1L	298	96	23	23	32.2148	7.71812	7.71812	100	23.9583
S2R	281	85	32	29	30.2491	11.3879	10.3203	90.625	34.1176
S3R	288	89	36	34	30.9028	12.5	11.8056	94.4444	38.2022
				Average	31.1222	10.5353	9.94799	95.0231	32.0927
Animal 2	DAPI (# cells)	Vglut2 (# cells)	Tac1 (# cells)	Vglut2+Tac1 (# cells)
S1L	389	177	27	22	45.5013	6.94087	5.65553	81.4815	12.4294
S2L	217	111	28	25	51.1521	12.9032	11.5207	89.2857	22.5225
S3L	247	122	27	23	49.3927	10.9312	9.31174	85.1852	18.8525
				Average	48.682	10.2584	8.82934	85.3175	17.9348
Animal 3	DAPI (# cells)	Vglut2 (# cells)	Tac1 (# cells)	Vglut2+Tac1 (# cells)
S1L	286	163	59	59	56.993	20.6294	20.6294	100	36.1963
S2L	268	136	30	26	50.7463	11.194	9.70149	86.6667	19.1176
S3L	238	119	30	26	50	12.605	10.9244	86.6667	21.8487
				Average	52.5798	14.8095	13.7517	91.1111	25.7209
Counting strategy:
Cells counted as expressing mRNA if 4 or more dots and/or 1 cluster overlapping with or adjacent to the cell nucleus (in order to differentiate from background dots and clusters, counts of 3 dots or less not included)
