# Supplementary material for: Medullary tachykinin precursor 1 neurons promote rhythmic breathing
Source: eLife. 2023 Jul 17;12:e85575. doi: 10.7554/eLife.85575 (PMC10400077; doi:10.7554/eLife.85575)
Supplement: Figure 4—figure supplement 1—source data 1. [file elife-85575-fig4-figsupp1-data1.xlsx]

## Sheet: Supp Figure 5
	Respiratory rate (breaths/min)
	Slc7a6-ChETA
	Baseline						Stimulation
Animals →	A1	A2	A3	A4	A5	A6	A1	A2	A3	A4	A5	A6
Laser frequency (Hz)
5	30.21	33.86	33.75	35.076	30.19	21.6	32.05	34.44	32.67	34.5	30.87	25
10	30.24	31.37	32.09	28.91	30.09	24.7	33.95	31.31	31.004	31.25	30.82	31.84
20	30.314	28.273	29.26	28.096	29.354	24.78	37.7	45.36	33.31	45.36	28.15	41.13
30	29.24	29.049	29.74	29.35	29.018	26.87	44.4	44.88	44.72	45.2	30.34	42.81
40	28.83	26.752	29.375	26.2	28.173	28.07	47.3	45.81	46.42	45.82	31.01	48.15
