# Supplementary material for: Medullary tachykinin precursor 1 neurons promote rhythmic breathing
Source: eLife. 2023 Jul 17;12:e85575. doi: 10.7554/eLife.85575 (PMC10400077; doi:10.7554/eLife.85575)
Supplement: Figure 4—source data 1. [file elife-85575-fig4-data1.xlsx]

## Sheet: Figure 4c
	Respiratory rate (% from baseline)
	Control					Vglut2-ChETA
Animals →	A1	A2	A3	A4	A5	B1	B2	B3	B4	B5	B6
Laser frequency (Hz)
5		98.6189	98.9578	103.842	100.101	106.121	101.704	96.8197	98.356	102.256	115.338
10		100.497	96.395	101.072	99.8872	112.281	99.7982	96.5947	108.128	102.43	128.831
20	94.2	100.163	90.6608	99.819	99.5629	124.37	160.46	113.8	161.4	96	165.937
30	96.4	102.828	99.4337	103.354	99.7645	151.81	154.5	150.2	154.02	104.5	159.342
40	91.2	98.062	106.083	98.379	101.119	164.26	171.24	158.03	174.8	110.2	171.515

## Sheet: Figure 4d
	Diaphragm amplitude (% from baseline)
	Control					Vglut2-ChETA
Animals →	A1	A2	A3	A4	A5	B1	B2	B3	B4	B5	B6
Laser frequency (Hz)
5		98.9408	97.1414	98.9146	99.58	97.3386	100.855	97.849	89.6787	101.201	106.788
10		99.3745	100.049	100.727	99.4791	98.989	109.058	102.934	94.6581	105.63	97.5213
20	104.3	99.45	99.8431	97.16	98.599	92.32	109.89	100.03	99.7	109.85	103.651
30	107.4	108.976	94.3554	89.085	99.4311	104.3	111.83	91.18	94.7	111.2	100.056
40	96.4	100.912	107.329	99.659	98.2371	87.94	115.73	96.7	98.6	114.2	108.677

## Sheet: Figure 4e
	Inspiratory time (% from baseline)
	Control				Vglut2-ChETA
Animals →	A1	A2	A3	A4	B1	B2	B3	B4	B5	B6
Laser frequency (Hz)
20	97.73	92.4	75.35	93.86	111.711	99.3151	110.754	95.189	92.1325	99.917
30	104.8	89.47	106.7	84.2	109.177	112	101.695	113.235	81.5816	103.309
40	85.43	123.85	84.41	108.7	103.725	106.419	97.8528	117.778	98.1088	87.9681

## Sheet: Figure 4f
	Expiratory time (% from baseline)
	Control				Vglut2-ChETA
Animals →	A1	A2	A3	A4	B1	B2	B3	B4	B5	B6
Laser frequency (Hz)
20	100.18	115.37	88.2	105.13	84.3478	57.3761	85.4375	57.9478	107.546	52.8302
30	96.92	109.4	98.2	102.7	60.592	63.4146	62.2817	63.1514	93.456	60.3583
40	97.7	94.17	87.89	88.83	57.5	62.4045	61.0651	64.422	91.2483	51.7628

## Sheet: Figure 4g
Respiratory rate (% from baseline)
Tac1-ChETA-4 weeks
Laser power (1 mW)	Laser power (3 mW)	Laser power (5 mW)	Laser power (10 mW)
106.956	113.665	123.605	164.264
120.111	168.139	179.46	171.246
99.6883	109.66	119.731	158.033
119.808	163.63	178.872	174.805
103.953	99.2093	105.177	110.078
108.522	159.608	182.93	171.515
