# Supplementary material for: Medullary tachykinin precursor 1 neurons promote rhythmic breathing
Source: eLife. 2023 Jul 17;12:e85575. doi: 10.7554/eLife.85575 (PMC10400077; doi:10.7554/eLife.85575)
Supplement: Figure 5—figure supplement 1—source data 1. [file elife-85575-fig5-figsupp1-data1.xlsx]

## Sheet: Supp Figure 6
	Tidal volume (% of baseline)
	Control				Tac1-ChETA
Animals →	A1	A2	A3	A4	B1	B2	B3	B4	B5	B6	B7	B8
Laser frequency (Hz)
30	98.4	104.4	86.3	100.73	91.69	77.26	101.644	99.57	111.76	127.95	79.79	98.86
40	83.6	101.58	93.78	76.8	94.88	120.65	84.95	83.56	74.68	109.83	120.31	221.7
50	118.8	99.2	109	87.9	95.02	109.81	71.83	112.07	107.2	91.53	83.3	132.87
60	40.3	99.92	97.2	100.2	77.57	108.1	84.678	87.41	106.22	91.48	102.94	74.07
80	93.5	96.3	105.8	101.77	97.68	104.7	82.584	76.41	109.37	123.94	92.72	70.3
