# Supplementary material for: Medullary tachykinin precursor 1 neurons promote rhythmic breathing
Source: eLife. 2023 Jul 17;12:e85575. doi: 10.7554/eLife.85575 (PMC10400077; doi:10.7554/eLife.85575)
Supplement: Figure 5—source data 1. [file elife-85575-fig5-data1.xlsx]

## Sheet: Figure 5d
Respiratory rate (breaths/min)
Calm				Active
Control		Tac1-ChETA-4 weeks		Control		Tac1-ChETA-4 weeks
Baseline	Stimulation	Baseline	Stimulation	Baseline	Stimulation	Baseline	Stimulation
162.79	150.79	205.73	401.15	339.79	248.58	278.05	398.15
162.08	150.71	200.65	349.98	224.03	211.61	261.2	304.33
172.27	166.31	264.65	301.96	241.27	247.57	146.5	155.53
177.53	186.88	184.32	234.98	145.07	192.37	344.7	441.06
133.35	133.64	167.45	251.11			191.88	331.68
		173.77	335.22			332.7	324.23
		113.87	255.03
		158.13	219.36
		163.04	241.04
		120.47	162.64
		254.23	436.07
		126.73	150.56
		133.21	160.87
		133.9	150.7
		136.29	341.16
		141.06	321.62
		137.3	333.53
		142.26	296.59
		195.08	293.84
		128.5	263.005
		133.72	253.06

## Sheet: Figure 5e
Respiratory rate (% from baseline)
Calm		Active
Control	Tac1-ChETA-4 weeks	Control	Tac1-ChETA-4 weeks
100.219	195.016	102.612	143.192
97.1082	174.422	73.18	116.514
96.5456	114.099	90.8159	106.169
104.93	127.486	94.4593	127.955
92.6277	149.959		172.86
92.9837	192.914		97.4529
	223.957
	138.724
	147.842
	135.008
	171.527
	118.805
	120.766
	112.543
	250.312
	227.996
	242.912
	208.486
	150.623
	204.666
	189.242

## Sheet: Figure 5f (1)
	Respiratory rate (% from baseline)
	Control				Tac1-ChETA-4 weeks
Animals →	A1	A2	A3	A4	B1	B2	B3	B4	B5	B6	B7	B8
Laser frequency (Hz)
30	106.8	89.7	94.8	99.74	219.38	224.8	137.4	103.54	106.47	132.31	175.05	165.95
40	92.7	98.3	96.6	100.21	195.01	114.09	127.48	223.95	118.8	250.31	208.5	204.66
50	98.9	101.7	95.2	110.2	109.67	243.66	92.55	131.32	147.67	172.83	141.48	189.67
60	103.1	93.9	99.5	97.97	167.89	215.52	119.35	134.7	117.61	157.44	118.22	220.75
80	103.5	102.6	93.8	97.12	101.28	134.57	112.47	160.58	105.64	124.73	128.7	223.47

## Sheet: Figure 5f (2)
	Inspiratory time (% from baseline)
	Control				Tac1-ChETA-4 weeks
Animals →	A1	A2	A3	A4	B1	B2	B3	B4	B5	B6	B7	B8
Laser frequency (Hz)
30	143.9	101.34	60	114.4	76.7596	60.5647	79.556	89.1937	118.123	80.5068	58.6921	83.161
40	116.1	90.6	104.5	100.57	57.8778	53.1843	51.6403	54.6005	77.7152	55.04	82.6238	59.5413
50	124.5	70.9	97.6	91.5	76.9998	57.1951	91.578	101.437	74.9652	46.4588	69.9169	52.4393
60	124.1	86.9	85.7	112.7	45.613	61.0691	94.1757	74.7197	113.795	71.4974	74.2532	67.8552
80	100.22	97.87	92	134.6	108.036	87.9313	74.4139	39.3557	86.4197	102.263	101.756	60.2931

## Sheet: Figure 5f (3)
	Expiratory time (% from baseline)
	Control				Tac1-ChETA-4 weeks
Animals →	A1	A2	A3	A4	B1	B2	B3	B4	B5	B6	B7	B8
Laser frequency (Hz)
30	125.3	81.7	119.6	82.9	26.0868	37.5913	102.328	68.3495	105.25	48.4533	88.9591	41.3009
40	146.1	96.4	106.3	102.7	54.4059	59.0614	81.1393	47.3911	104.296	49.568	139.965	41.7123
50	95.3	104.7	110	119.6	58.4737	56.0439	127.419	88.4057	77.5954	60.248	112.395	35.4761
60	98.5	82.4	88.5	114.6	29.0346	92.1386	76.1518	97.7109	84.026	58.7572	46.4629	55.4307
80	119.8	101.6	110.8	106.6	95.4252	89.828	108.85	122.564	87.5857	96.0209	89.6677	25.8913
