# Supplementary material for: Medullary tachykinin precursor 1 neurons promote rhythmic breathing
Source: eLife. 2023 Jul 17;12:e85575. doi: 10.7554/eLife.85575 (PMC10400077; doi:10.7554/eLife.85575)
Supplement: Figure 6—source data 1. [file elife-85575-fig6-data1.xlsx]

## Sheet: Figure 6c
	Velocity (cm/s)
	Tac1-ChETA-4 weeks
Time (sec)	A1	A2	A3	A4	A5	A6	A7	A8	A9	A10	← Animals
1	0.039954	0.02312	0.022503	0.028243	0.039034	0.025788	0.036881	0.047078	0.080519	0.040799
2	0.039622	0.022311	0.023875	0.024746	0.039896	0.027405	0.044445	0.044981	0.086528	0.038798
3	0.03985	0.022977	0.026162	0.024377	0.04943	0.030917	0.096707	0.04193	0.110659	0.051164
4	0.100654	0.022243	0.019457	0.028668	0.05196	0.020455	0.032336	0.102634	0.08006	0.043875
5	0.039184	0.022518	0.022069	0.022313	0.043695	0.029604	0.050121	0.129708	0.108323	0.036101
6	0.041267	0.024418	0.027861	0.023475	0.043469	0.024916	0.025652	0.037642	0.095473	0.048544
7	0.060244	0.023349	0.019077	0.0306	0.044585	0.024597	0.0304	0.038231	0.090578	0.037645
8	0.021977	0.021023	0.0197	0.030574	0.228807	0.02738	0.051612	0.037012	0.089984	0.050274
9	0.026559	0.021762	0.023258	0.029725	0.273299	0.02668	0.02981	0.041946	0.538259	0.04753
10	0.04716	0.204149	0.021251	0.024957	0.399454	0.02009	0.037755	0.048392	1.43415	0.035487
11	0.208059	0.460858	0.021729	0.240496	0.14257	0.035116	0.018345	0.412472	1.45164	0.147773
12	0.196398	0.561498	0.063512	0.631911	0.266954	0.038146	1.09288	1.38414	0.996618	0.941947
13	0.459293	0.615872	0.123724	1.10025	0.358858	0.030512	2.52103	1.73785	2.44128	0.663507
14	0.165466	2.61276	0.68954	1.44269	0.371714	0.025659	2.56617	0.819297	1.63154	0.937097
15	0.353366	0.923337	1.51156	0.459914	0.601287	0.022296	1.52357	0.873084	2.42519	1.12324
16	0.443194	1.09181	0.54809	0.608885	0.748008	0.106709	2.02937	1.01861	4.07168	3.14562
17	1.86448	1.37593	0.989402	0.508605	0.254219	0.023271	3.37752	1.58774	4.69296	3.38089
18	2.73739	2.54467	0.480411	0.624302	0.072511	0.028862	2.66682	0.769661	3.67941	2.11405
19	3.67426	5.61923	0.617354	0.969043	0.534316	0.060961	1.87355	0.686196	0.931986	1.43484
20	5.29946	8.63136	0.088649	0.735949	2.40408	0.058672	5.15725	1.24935	1.26024	1.47856
21	1.66601	2.36033	0.074897	0.731122	1.62227	0.073796	2.89627	0.448263	1.34736	0.291058
22	1.86492	4.04707	0.074897	1.14278	1.5772	0.062125	1.6176	0.636777	1.3049	1.3935
23	0.972633	4.36532	0.088834	1.13187	2.8438	0.052896	1.61844	0.500634	1.71154	1.83986
24	1.19432	3.09281	0.067025	0.35245	3.24139	0.060213	0.163163	0.694734	2.42338	1.6263
25	0.884122	1.85051	0.024267	0.072903	1.96454	0.314715	0.827617	1.00686	4.01683	0.741222
26	0.476529	1.63977	0.153961	0.09817	3.77078	1.29116	0.566331	0.892308	3.77998	0.093141
27	0.087487	1.49619	0.137894	0.073491	3.3959	1.58315	0.164671	0.931178	2.11318	0.045488
28	0.036916	0.754732	0.045584	0.144264	5.40273	1.31841	0.069711	0.579728	0.759397	0.047288
29	0.01926	0.495263	0.017531	0.104995	5.15445	0.626785	0.17478	0.277368	1.82869	0.047917
30	0.021645	0.340892	0.018951	0.083636	3.13126	0.466259	0.167895	0.084247	2.24232	0.041982

## Sheet: Figure 6d
	Activity (% pixel change)
	Control				Tac1-ChETA-4 weeks
Animals →	A1	A2	A3	A4	B1	B2	B3	B4	B5	B6	B7	B8	B9	B10
Baseline	0.298683	0.420978	0.115332	0.085982	0.189311	0.114794	0.197655	0.220447	0.567666	0.227992	0.373915	0.255514	0.478742	0.044035
Laser	0.245493	0.271292	0.110298	0.062513	1.88936	2.482	1.21489	2.23616	1.74893	0.31038	2.47626	1.88835	2.85427	2.63697
recovery	0.258656	0.363898	0.094939	0.053768	1.06576	2.44101	0.45101	0.831045	3.87984	1.0612	1.28746	1.48722	2.08308	0.055589

## Sheet: Figure 6e
	Velocity (cm/s)
	Control				Tac1-ChETA-4 weeks
Animals →	A1	A2	A3	A4	B1	B2	B3	B4	B5	B6	B7	B8	B9	B10
Baseline	0.05977	0.050851	0.039093	0.032075	0.04423	0.038606	0.022834	0.027134	0.115273	0.025641	0.041853	0.055843	0.288013	0.043126
Laser	0.07843	0.034288	0.045963	0.029646	1.55158	2.43615	0.473533	0.732106	0.670617	0.045818	2.33843	0.998788	2.26635	1.45323
recovery	0.05025	0.040317	0.042801	0.025441	0.50907	1.73375	0.06137	0.311841	3.62087	0.557531	0.550941	0.522563	2.20531	0.25804

## Sheet: Figure 6h
	Locomotion (rotations/min)
	Immobile/slow running							running
Animals →	B1	B2	B3	B4	B5	B6	B7	B1	B2	B3	B4	B5	B6	B7
Baseline	6	3	18	7.5	18	11.25	7	33	55.8	30	34.8	30	31.2	41.1429
Laser stimulation (40Hz)	33	30	33	33	26	30.75	36	40	70.2	15	38.4	34	33	48
