# Supplementary material for: Medullary tachykinin precursor 1 neurons promote rhythmic breathing
Source: eLife. 2023 Jul 17;12:e85575. doi: 10.7554/eLife.85575 (PMC10400077; doi:10.7554/eLife.85575)
Supplement: Figure 7—source data 1. [file elife-85575-fig7-data1.xlsx]

## Sheet: Figure 7c
Region of the preBotzinger complex (PreBotC)
					% of DAPI cells			% co-expressing cells
Animal 1	DAPI (# cells)	Oprm1 (# cells)	Tac1 (# cells)	Oprm1+Tac1 (# cells)	Oprm1	Tac1	Oprm1+Tac1	Oprm1+Tac1 / Tac1	Oprm1+Tac1 / Oprm1
Section 1	301	83	13	9	27.5748	4.31894	2.99003	69.2308	10.8434
Section 2	301	104	18	10	34.5515	5.98007	3.32226	55.5556	9.61538
Section 3	286	87	16	11	30.4196	5.59441	3.84615	68.75	12.6437
				Avg	30.8486	5.2978	3.38615	64.5121	11.0341
Animal 2	DAPI (# cells)	Oprm1 (# cells)	Tac1 (# cells)	Oprm1+Tac1 (# cells)
Section 1	269	152	96	81	56.5056	35.6877	30.1115	84.375	53.2895
Section 2	269	150	112	90	55.7621	41.6357	33.4572	80.3571	60
Section 3	369	180	114	90	48.7805	30.8943	24.3902	78.9474	50
				Avg	53.6827	36.0726	29.3197	81.2265	54.4298
Animal 3	DAPI (# cells)	Oprm1 (# cells)	Tac1 (# cells)	Oprm1+Tac1 (# cells)
Section 1	296	164	132	119	55.4054	44.5946	40.2027	90.1515	72.561
Section 2	246	71	41	31	28.8618	16.6667	12.6016	75.6098	43.662
Section 3	189	52	21	17	27.5132	11.1111	8.99471	80.9524	32.6923
				Avg	37.2601	24.1241	20.5997	82.2379	49.6384
Counting strategy:
Cells counted as expressing mRNA if 4 or more dots and/or 1 cluster overlapping with or adjacent to the cell nucleus (in order to differentiate from background dots and clusters, counts of 3 dots or less not included)
