# Supplementary material for: Medullary tachykinin precursor 1 neurons promote rhythmic breathing
Source: eLife. 2023 Jul 17;12:e85575. doi: 10.7554/eLife.85575 (PMC10400077; doi:10.7554/eLife.85575)
Supplement: Figure 8—figure supplement 1—source data 1. [file elife-85575-fig8-figsupp1-data1.xlsx]

## Sheet: Supp Figure 7a
	Respiratory rate (breaths/min)
	Tac1-ChETA-4 weeks
Animals →	A1	A2	A3	A4	A5	A6	A7
Baseline	34.921	19.1702	18.9138	20.8904	22.9952	16.0953	32.105
Fentanyl	20.4084	10.1985	11.6059	10.3967	18.0596	8.67433	17.8804
20 Hz	39.9088	12.27	18.26	13.4699	23.1091	17.8767	29.1306
30 Hz	45.1756	14.4645	20.307	15.0673	22.7649	15.0409	22.5456
40 Hz	47.7779	12.6029	19.229	15.4059	23.5975	15.8712	23.9565

## Sheet: Supp Figure 7b
	Respiratory rate (breaths/min)
	Tac1-ChETA receiving Saline				Tac1-ChETA receiving fentanyl
Animals →	A1	A2	A3	A4	B1	B2	B3	B4	B5	B6	B7	B8	B9	B10
Baseline	177.556	192.023	177.727	189.063	183.001	158.774	153.133	134.648	217.594	184.98	171.426	183.669	157.474	165.1
Fentanyl	422.783	285.405	250.277	411.418	166.505	142.086	172.707	126.615	177.597	157.732	169.883	130.61	158.658	134.333
Laser	324.447	328.09	325.302	337.844	277.501	224.819	159.422	156.046	240.73	157.56	227.655	219.932	210.539	281.205

## Sheet: Supp Figure 7c
	Tidal volume (ml BTPS)
	Tac1-ChETA receiving Saline				Tac1-ChETA receiving fentanyl
Animals →	A1	A2	A3	A4	B1	B2	B3	B4	B5	B6	B7	B8	B9	B10
Baseline	6.38652	18.5997	4.40485	10.1524	2.00165	1.37121	0.924807	1.10291	1.3086	1.15381	1.50685	4.14802	6.97895	1.58362
Fentanyl	5.28149	17.7396	4.6343	9.6829	3.71046	2.68172	1.98012	1.89277	2.51042	2.47277	2.65745	7.33678	15.9104	2.17816
Laser	6.13841	20.3718	5.11802	15.8737	4.08987	2.23704	1.64202	2.50647	2.41947	2.51539	2.36219	5.78698	13.4282	1.92187
