# Supplementary material for: Medullary tachykinin precursor 1 neurons promote rhythmic breathing
Source: eLife. 2023 Jul 17;12:e85575. doi: 10.7554/eLife.85575 (PMC10400077; doi:10.7554/eLife.85575)
Supplement: Figure 8—source data 1. [file elife-85575-fig8-data1.xlsx]

## Sheet: Figure 8c,d
	Respiratory rate (% from baseline)
	Tac1-ChETA-4 weeks
Animals →	A1	A2	A3	A4	A5	A6	A7
Baseline	100	100	100	100	100	100	100
Fentanyl	40.396	48.499	45.707	40.253	86.748	54.83	58.7242
20 Hz	114.283	64.006	96.544	64.479	100.495	111.068	90.7354
30 Hz	129.365	75.453	107.366	72.125	98.999	93.449	70.2246
40 Hz	65.742	65.742	101.666	73.746	102.619	98.609	74.6193

## Sheet: Figure 8g (1)
	Respiratory rate (% from baseline)
	Tac1-ChETA receiving Saline				Tac1-ChETA receiving fentanyl
Animals →	A1	A2	A3	A4	B1	B2	B3	B4	B5	B6	B7	B8	B9	B10
Baseline	100	100	100	100	100	100	100	100	100	100	100	100	100	100
Fentanyl	238.112	148.631	140.821	217.608	90.98	89.49	112.78	94.04	81.62	85.27	99.1	71.1117	100.751	81.3641
Laser	182.729	170.86	183.034	178.693	151.63	141.596	104.107	115.891	110.632	85.1767	132.801	119.743	133.697	170.324

## Sheet: Figure 8g (2)
	Tidal volume (% from baseline)
	Tac1-ChETA receiving Saline				Tac1-ChETA receiving fentanyl
Animals →	A1	A2	A3	A4	B1	B2	B3	B4	B5	B6	B7	B8	B9	B10
Baseline	100	100	100	100	100	100	100	100	100	100	100	100	100	100
Fentanyl	82.6975	95.3757	105.209	95.3757	185.37	195.57	214.111	171.616	191.839	214.313	176.358	176.874	227.976	137.543
Laser	96.1151	109.528	116.19	156.355	204.32	163.14	177.552	227.26	184.889	218.008	156.764	139.512	192.41	121.359

## Sheet: Figure 8h (1)
	Velocity (cm/s)
	Tac1-ChETA receiving Saline				Tac1-ChETA receiving fentanyl
Animals →	A1	A2	A3	A4	B1	B2	B3	B4	B5	B6	B7	B8	B9
Baseline	0.027932	0.045885	0.058965	0.056207	0.03992	0.025891	0.028619	0.037324	0.033364	0.173083	0.067192	0.069164	0.122907
1 min	1.08274	1.04686	0.315714	1.66513	0.1354	0.273164	2.29086	1.79698	2.87717	2.52336	2.48039	5.37108	1.4788
2 min	0.764551	0.683473	0.050538	0.473234	0.942235	0.771295	2.39821	2.32139	2.17247	2.33116	3.44328	5.64132	1.60745
3 min	1.49179	1.26011	0.626825	0.9886	0.785938	1.4675	2.78615	2.74624	1.31677	2.49141	3.1588	3.776	0.784293
4 min	0.519221	0.856213	0.499785	0.538445	1.17487	2.06964	2.39914	2.24325	2.63238	2.2601	2.72162	4.73467	1.16463
5 min	0.290678	0.85776	0.441015	1.3949	1.66843	2.04147	2.14289	3.19377	2.66912	2.08043	2.8912	4.58581	1.10461
Laser	2.65108	2.0143	3.35262	1.36172	1.93369	2.8643	2.33622	4.11521	3.90357	2.28735	3.24527	6.2873	3.70343

## Sheet: Figure 8h (2)
	Velocity (% from baseline)
	Tac1-ChETA receiving Saline				Tac1-ChETA receiving fentanyl
Animals →	A1	A2	A3	A4	B1	B2	B3	B4	B5	B6	B7	B8	B9
Baseline	100	100	100	100	100	100	100	100	100	100	100	100	100
Fentanyl	2951.94	2061.68	657.541	1817.57	2398.6	5178.72	8391.42	6635.05	6989.51	1347.78	4356.68	6953.15	997.992
Laser	9491.18	4389.94	5685.78	2422.7	4843.94	11062.9	8163.32	11025.8	11699.8	1321.54	4829.82	9090.46	3013.19
